# Supplementary material for: Congruence and Complementarity of Differential Mobility Spectrometry and NMR Spectroscopy for Plasma Lipidomics
Source: MDPI journal article supplement (doi:10.3390/metabo12111030), 2022-10-27
Supplement: s1 [file s1]

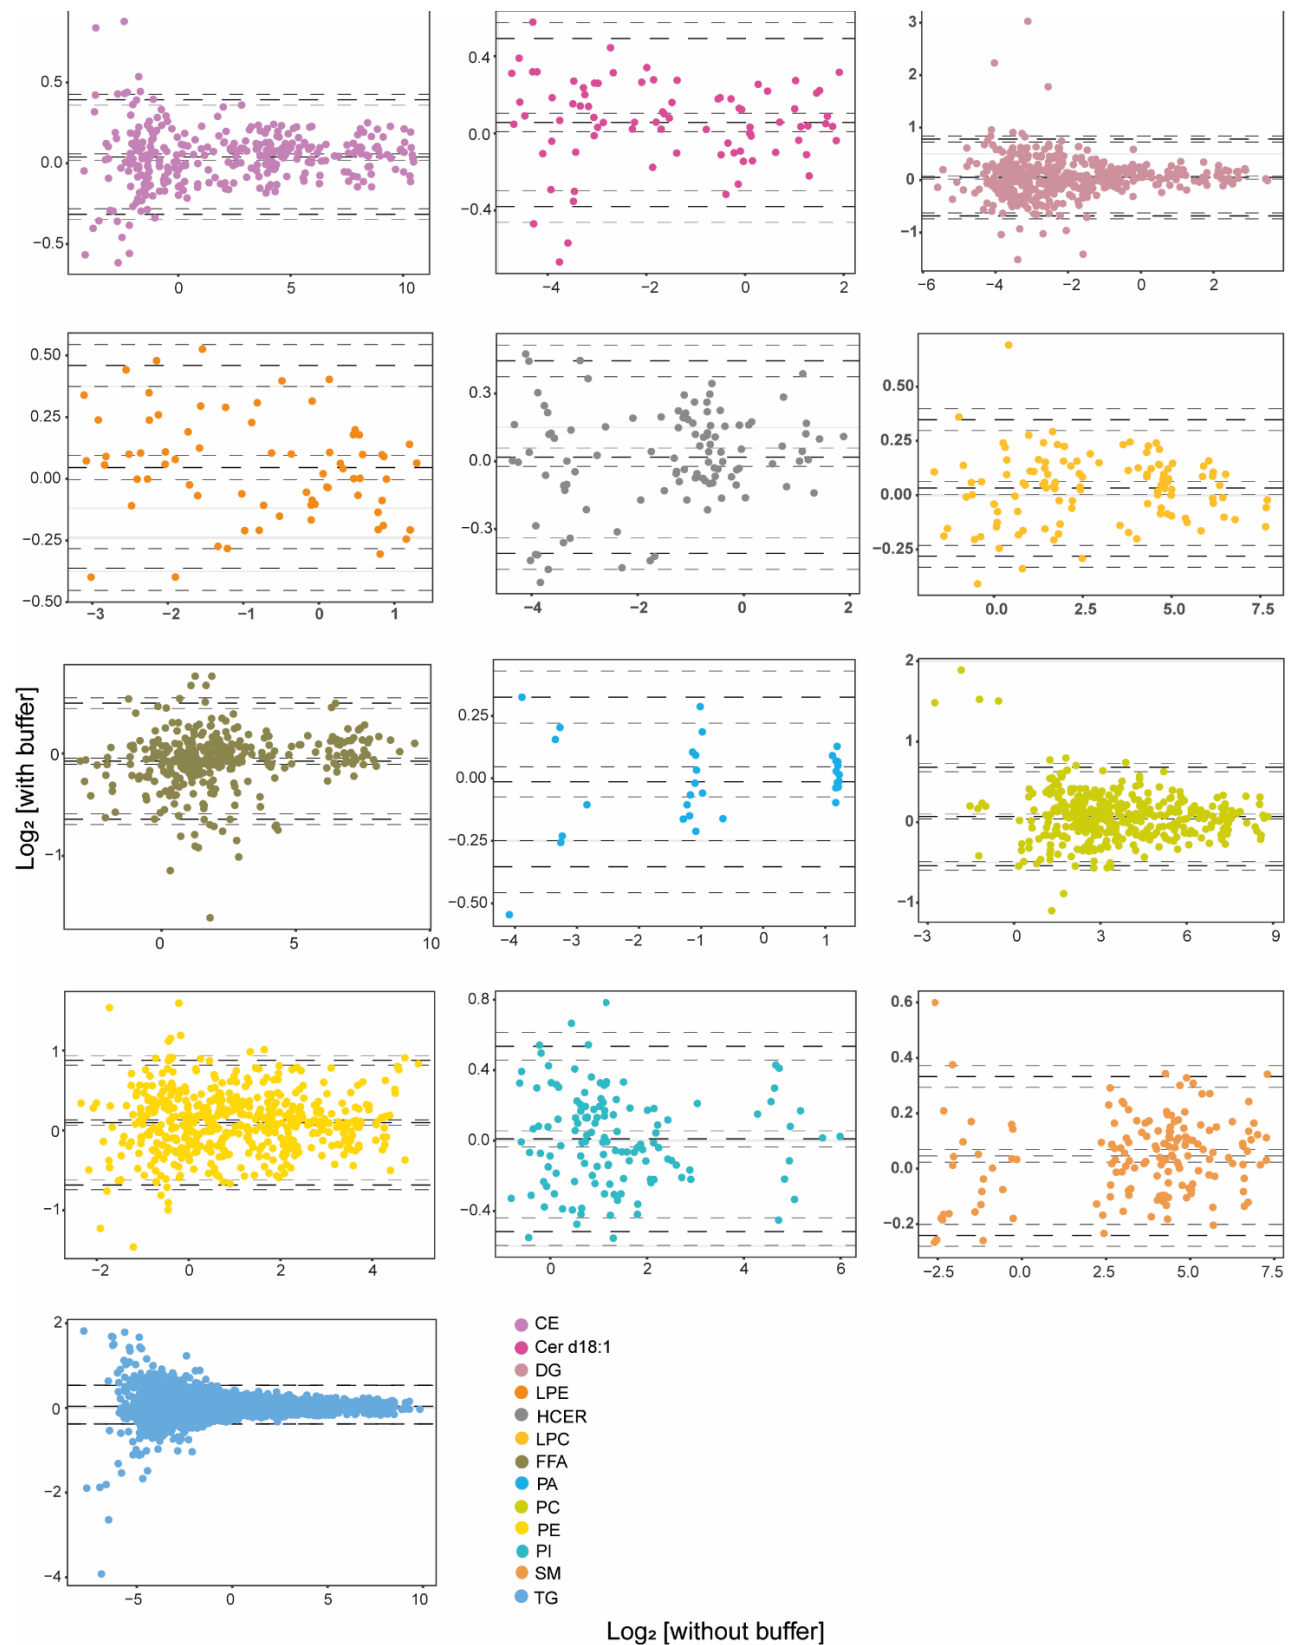

**Supplemental Figure S1.** Bland-Altman analysis of DMS-SLA measured samples with and without buffer addition.

**Table S1:** Abbreviations and full names of lipoprotein particles measured with NMR

| <b>Names</b>                                                             | <b>Abbreviations</b> |
|--------------------------------------------------------------------------|----------------------|
| Calculated Figures, Apo-A1 / Apo-B100, Apo-B100/Apo-A1                   | ABA1                 |
| Calculated Figures, IDL Particle Number, IDL Particle Number             | IDPN                 |
| Calculated Figures, LDL Cholesterol / HDL Cholesterol, LDL-Chol/HDL-Chol | LDHD                 |
| Calculated Figures, LDL Particle Number, LDL Particle Number             | LDPN                 |
| Calculated Figures, LDL-1 Particle Number, LDL-1 Particle Number         | L1PN                 |
| Calculated Figures, LDL-2 Particle Number, LDL-2 Particle Number         | L2PN                 |
| Calculated Figures, LDL-3 Particle Number, LDL-3 Particle Number         | L3PN                 |
| Calculated Figures, LDL-4 Particle Number, LDL-4 Particle Number         | L4PN                 |
| Calculated Figures, LDL-5 Particle Number, LDL-5 Particle Number         | L5PN                 |
| Calculated Figures, LDL-6 Particle Number, LDL-6 Particle Number         | L6PN                 |
| Calculated Figures, Total ApoB Particle Number, Total Particle Number    | TBPN                 |
| Calculated Figures, VLDL Particle Number, VLDL Particle Number           | VLPN                 |
| HDL Subfractions, Apo-A1, HDL-1                                          | H1A1                 |
| HDL Subfractions, Apo-A1, HDL-2                                          | H2A1                 |
| HDL Subfractions, Apo-A1, HDL-3                                          | H3A1                 |
| HDL Subfractions, Apo-A1, HDL-4                                          | H4A1                 |
| HDL Subfractions, Apo-A2, HDL-1                                          | H1A2                 |
| HDL Subfractions, Apo-A2, HDL-2                                          | H2A2                 |
| HDL Subfractions, Apo-A2, HDL-3                                          | H3A2                 |
| HDL Subfractions, Apo-A2, HDL-4                                          | H4A2                 |
| HDL Subfractions, Cholesterol, HDL-1                                     | H1CH                 |
| HDL Subfractions, Cholesterol, HDL-2                                     | H2CH                 |
| HDL Subfractions, Cholesterol, HDL-3                                     | H3CH                 |
| HDL Subfractions, Cholesterol, HDL-4                                     | H4CH                 |
| HDL Subfractions, Free Cholesterol, HDL-1                                | H1FC                 |
| HDL Subfractions, Free Cholesterol, HDL-2                                | H2FC                 |
| HDL Subfractions, Free Cholesterol, HDL-3                                | H3FC                 |
| HDL Subfractions, Free Cholesterol, HDL-4                                | H4FC                 |
| HDL Subfractions, Phospholipids, HDL-1                                   | H1PL                 |
| HDL Subfractions, Phospholipids, HDL-2                                   | H2PL                 |
| HDL Subfractions, Phospholipids, HDL-3                                   | H3PL                 |
| HDL Subfractions, Phospholipids, HDL-4                                   | H4PL                 |
| HDL Subfractions, Triglycerides, HDL-1                                   | H1TG                 |
| HDL Subfractions, Triglycerides, HDL-2                                   | H2TG                 |
| HDL Subfractions, Triglycerides, HDL-3                                   | H3TG                 |
| HDL Subfractions, Triglycerides, HDL-4                                   | H4TG                 |
| LDL Subfractions, Apo-B, LDL-1                                           | L1AB                 |
| LDL Subfractions, Apo-B, LDL-2                                           | L2AB                 |
| LDL Subfractions, Apo-B, LDL-3                                           | L3AB                 |
| LDL Subfractions, Apo-B, LDL-4                                           | L4AB                 |
| LDL Subfractions, Apo-B, LDL-5                                           | L5AB                 |
| LDL Subfractions, Apo-B, LDL-6                                           | L6AB                 |
| LDL Subfractions, Cholesterol, LDL-1                                     | L1CH                 |
| LDL Subfractions, Cholesterol, LDL-2                                     | L2CH                 |
| LDL Subfractions, Cholesterol, LDL-3                                     | L3CH                 |
| LDL Subfractions, Cholesterol, LDL-4                                     | L4CH                 |

|                                                    |      |
|----------------------------------------------------|------|
| LDL Subfractions, Cholesterol, LDL-5               | L5CH |
| LDL Subfractions, Cholesterol, LDL-6               | L6CH |
| LDL Subfractions, Free Cholesterol, LDL-1          | L1FC |
| LDL Subfractions, Free Cholesterol, LDL-2          | L2FC |
| LDL Subfractions, Free Cholesterol, LDL-3          | L3FC |
| LDL Subfractions, Free Cholesterol, LDL-4          | L4FC |
| LDL Subfractions, Free Cholesterol, LDL-5          | L5FC |
| LDL Subfractions, Free Cholesterol, LDL-6          | L6FC |
| LDL Subfractions, Phospholipids, LDL-1             | L1PL |
| LDL Subfractions, Phospholipids, LDL-2             | L2PL |
| LDL Subfractions, Phospholipids, LDL-3             | L3PL |
| LDL Subfractions, Phospholipids, LDL-4             | L4PL |
| LDL Subfractions, Phospholipids, LDL-5             | L5PL |
| LDL Subfractions, Phospholipids, LDL-6             | L6PL |
| LDL Subfractions, Triglycerides, LDL-1             | L1TG |
| LDL Subfractions, Triglycerides, LDL-2             | L2TG |
| LDL Subfractions, Triglycerides, LDL-3             | L3TG |
| LDL Subfractions, Triglycerides, LDL-4             | L4TG |
| LDL Subfractions, Triglycerides, LDL-5             | L5TG |
| LDL Subfractions, Triglycerides, LDL-6             | L6TG |
| Lipoprotein Main Fractions, Apo-A1, HDL            | HDA1 |
| Lipoprotein Main Fractions, Apo-A2, HDL            | HDA2 |
| Lipoprotein Main Fractions, Apo-B, IDL             | IDAB |
| Lipoprotein Main Fractions, Apo-B, LDL             | LDAB |
| Lipoprotein Main Fractions, Apo-B, VLDL            | VLAB |
| Lipoprotein Main Fractions, Cholesterol, HDL       | HDCH |
| Lipoprotein Main Fractions, Cholesterol, IDL       | IDCH |
| Lipoprotein Main Fractions, Cholesterol, LDL       | LDCH |
| Lipoprotein Main Fractions, Cholesterol, VLDL      | VLCH |
| Lipoprotein Main Fractions, Free Cholesterol, HDL  | HDFC |
| Lipoprotein Main Fractions, Free Cholesterol, IDL  | IDFC |
| Lipoprotein Main Fractions, Free Cholesterol, LDL  | LDFC |
| Lipoprotein Main Fractions, Free Cholesterol, VLDL | VLFC |
| Lipoprotein Main Fractions, Phospholipids, HDL     | HDPL |
| Lipoprotein Main Fractions, Phospholipids, IDL     | IDPL |
| Lipoprotein Main Fractions, Phospholipids, LDL     | LDPL |
| Lipoprotein Main Fractions, Phospholipids, VLDL    | VLPL |
| Lipoprotein Main Fractions, Triglycerides, HDL     | HDTG |
| Lipoprotein Main Fractions, Triglycerides, IDL     | IDTG |
| Lipoprotein Main Fractions, Triglycerides, LDL     | LDTG |
| Lipoprotein Main Fractions, Triglycerides, VLDL    | VLTG |
| Main Parameters, Apo-A1, Apo-A1                    | TPA1 |
| Main Parameters, Apo-A2, Apo-A2                    | TPA2 |
| Main Parameters, Apo-B100, Apo-B100                | TPAB |
| Main Parameters, Cholesterol, Chol                 | TPCH |
| Main Parameters, HDL Cholesterol, HDL-Chol         | HDCH |
| Main Parameters, LDL Cholesterol, LDL-Chol         | LDCH |
| Main Parameters, Triglycerides, TG                 | TPTG |
| VLDL Subfractions, Cholesterol, VLDL-1             | V1CH |

|                                             |      |
|---------------------------------------------|------|
| VLDL Subfractions, Cholesterol, VLDL-2      | V2CH |
| VLDL Subfractions, Cholesterol, VLDL-3      | V3CH |
| VLDL Subfractions, Cholesterol, VLDL-4      | V4CH |
| VLDL Subfractions, Cholesterol, VLDL-5      | V5CH |
| VLDL Subfractions, Free Cholesterol, VLDL-1 | V1FC |
| VLDL Subfractions, Free Cholesterol, VLDL-2 | V2FC |
| VLDL Subfractions, Free Cholesterol, VLDL-3 | V3FC |
| VLDL Subfractions, Free Cholesterol, VLDL-4 | V4FC |
| VLDL Subfractions, Free Cholesterol, VLDL-5 | V5FC |
| VLDL Subfractions, Phospholipids, VLDL-1    | V1PL |
| VLDL Subfractions, Phospholipids, VLDL-2    | V2PL |
| VLDL Subfractions, Phospholipids, VLDL-3    | V3PL |
| VLDL Subfractions, Phospholipids, VLDL-4    | V4PL |
| VLDL Subfractions, Phospholipids, VLDL-5    | V5PL |
| VLDL Subfractions, Triglycerides, VLDL-1    | V1TG |
| VLDL Subfractions, Triglycerides, VLDL-2    | V2TG |
| VLDL Subfractions, Triglycerides, VLDL-3    | V3TG |
| VLDL Subfractions, Triglycerides, VLDL-4    | V4TG |
| VLDL Subfractions, Triglycerides, VLDL-5    | V5TG |
